# Supplementary material for: Combining Multiple Assays Improves Detection and Serotyping of Foot-and-Mouth Disease Virus. A Practical Example with Field Samples from East Africa
Source: MDPI journal article supplement (doi:10.3390/v13081583), 2021-08-10
Supplement: s1 [file s1]

## Supplementary Materials

**Table S1.** List of samples resulted positive to FMDV SAT1 with real-time RT-PCR results.

| SAMPLE No | Ct values<br>real-time<br>RT-PCR 3D | Ct values<br>real-time<br>RT-PCR VP1 |
|-----------|-------------------------------------|--------------------------------------|
| 392225    | 30,04                               | 28,72                                |
| 378140    | 19,79                               | 22,08                                |
| 378159/1  | 15,99                               | 20,21                                |
| 378177/1  | 19,27                               | 24,18                                |
| 378177/2  | 17,02                               | 19,75                                |
| 378194/1  | 14,30                               | 15,87                                |
| 378194/2  | 16,77                               | 18,64                                |
| 378199    | 10,19                               | 10,96                                |
| 378205/1  | 15,18                               | 16,91                                |
| 378205/2  | 13,24                               | 13,78                                |
| 347782/1  | 19,48                               | nd                                   |
| 350434/1  | 19,61                               | nd                                   |
| 350434/2  | 20,87                               | nd                                   |
| 350434/3  | 10,26                               | nd                                   |
| 350434/4  | 17,27                               | nd                                   |
| 350434/5  | 17,33                               | 19,87                                |
| 353693/2  | 19,79                               | 19,69                                |
| 353693/3  | 13,51                               | 15,63                                |
| 353693/4  | 10,29                               | 12,76                                |
| 353717/1  | 17,34                               | 23,53                                |
| 353717/3  | 13,45                               | nd                                   |
| 359649/1  | 18,56                               | 16,08                                |
| 359674/2  | 15,82                               | 17,05                                |
| 359674/3  | 16,90                               | 19,07                                |
| 359674/4  | 10,12                               | 10,06                                |
| 359674/5  | 16,24                               | 15,19                                |
| 359674/7  | 22,25                               | 25,18                                |
| 359708/1  | 18,24                               | 26,69                                |
| 359708/2  | 17,45                               | 23,92                                |
| 359708/4  | 14,18                               | 17,20                                |
| 359717    | 16,93                               | 20,83                                |

This table lists all samples resulted positive to SAT1 (first column) and shows the Ct values of pan-FMDV real-time RT-PCR (second column) and topotype-specific real-time RT-PCR (third column). Samples not detected (nd) by the specific reaction are in italic. In these samples the pan-FMDV test yielded Ct values within the same range of all other samples, thus excluding low virus concentration as cause for failure. nd, not detected.

**Table S2.** Ag-ELISA and real-time RT-PCR results for samples in which two serotypes were detected.

| SAMPLE No | Ag-ELISA | VI + Ag-ELISA | Ct values<br>real-time<br>RT-PCR 3D | Ct values<br>real-time<br>RT-PCR VP1 |                       |
|-----------|----------|---------------|-------------------------------------|--------------------------------------|-----------------------|
| 40783/1   | SAT2     | SAT2          | 13,84                               | SAT2/IV<br>34.54                     | O/EA2-4<br>41.13      |
| 211987/1  | NEG      | SAT2          | 25,13                               | A/AFRICA/G-I<br>25.66                | SAT2/IV<br>33.33      |
| 211987/2  | NEG      | SAT2          | 24,68                               | A/AFRICA/G-I<br>24.24                | SAT2/IV<br>37.21      |
| 211987/3  | A        | A             | 7,83                                | A/AFRICA/G-I<br>7.26                 | SAT2/IV<br>42.80      |
| 378194/1  | SAT1     | SAT1          | 14,3                                | SAT1/I (NWZ)<br>15.87                | A/AFRICA/G-I<br>31.64 |

This table includes all samples in which two serotypes were detected (first column), the results of Ag-ELISA testing (second column), the type of isolated virus (third column) and the Ct values of pan-FMDV real-time RT-PCR (fourth column) and of the topotype-specific real-time RT-PCRs showing a positive outcome (fifth and last column). Samples with consequential numbers (i.e. 211987/1, 2 and 3) were collected contemporarily in the same farm and according to type-specific real-time RT-PCRs all harbour viruses of serotype A and SAT2; however, even if all three samples displayed lower Ct for type A reaction, in the first two the type SAT2 virus was isolated on LFBK cell line, while the type A virus emerged in culture from the third sample, which was even more rich in this serotype according the real-time RT-PCR outcomes.

**Table S3.** Samples positive only by 3D real-time RT-PCR.

| <b>SAMPLE No</b> | <b>Ct values<br/>real-time<br/>RT-PCR 3D</b> | <b>Ct values<br/>real-time<br/>RT-PCR VP1</b> | <b>Type</b> |
|------------------|----------------------------------------------|-----------------------------------------------|-------------|
| <b>40767</b>     | 23.25                                        | nd                                            | nd          |
| <b>347782/2</b>  | 34.94                                        | nd                                            | nd          |

This table lists the two samples positive (first column) only by real-time RT-PCR targeted on 3D (second column), with relevant Ct values. These samples could not be typed, neither by topotype-specific real-time RT-PCR (third column) nor by any other test (fourth column; nd: not detected).
